# Supplementary material for: Closed–loop oxygen control improves oxygenation in pediatric patients under high–flow nasal oxygen—A randomized crossover study
Source: Frontiers journal article supplement (doi:10.3389/fmed.2022.1046902), 2022-11-16

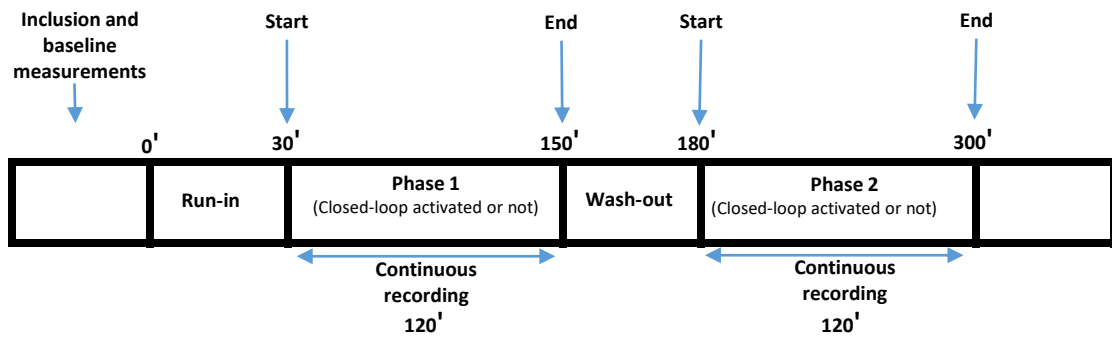

Supplement: Data_Sheet_1.PDF [file Data_Sheet_1.PDF]
